# Supplementary material for: Colorimetric copper(ii) ion sensor based on the conformational change of peptide immobilized onto the surface of gold nanoparticles
Source: Royal Society of Chemistry journal article supplement (doi:10.1039/c3ay42211a), 2014-01-01
Supplement: c3ay42211a.pdf [file c3ay42211a.pdf]

## Electronic Supplementary Information

### Colorimetric copper (II) ion sensor based on the conformational change of peptide immobilized onto the surface of gold nanoparticles

Hongxia Chen<sup>a</sup>, Jiangjiang Zhang<sup>a</sup>, Xinjian Liu<sup>b</sup>, Yanmin Gao<sup>a</sup>, Zonghuang Ye<sup>b</sup>, Genxi Li<sup>\*a,b</sup>

<sup>a</sup>Laboratory of Biosensing Technology, School of Life Sciences, Shanghai University, Shanghai 200444, P R China

<sup>b</sup>Department of Biochemistry and State Key Laboratory of Pharmaceutical Biotechnology, Nanjing University, Nanjing 210093, P R China. Fax: +86 25 83592510; E-mail address: genxili@nju.edu.cn.

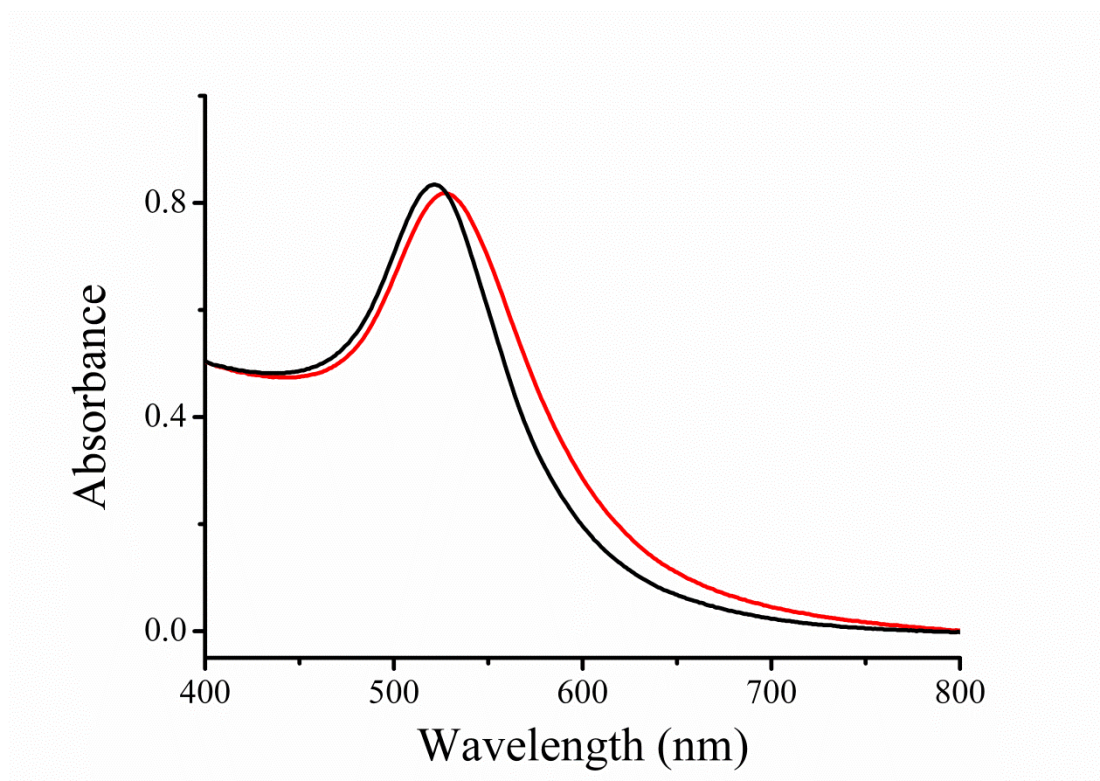

Fig. S1 UV-vis absorption spectra of BSA-absorbed gold nanoparticles before (black trace) and after (red trace) addition of 100 μM copper (II) ions.
